# Supplementary material for: Optimized Nuclear Pellet Method for Extracting Next-Generation Sequencing Quality Genomic DNA from Fresh Leaf Tissue
Source: PubMed Central journal article supplement (PMC6632156; doi:10.3390/mps2020054), 2019-06-25
Supplement: mps-02-00054-s001.pdf [file mps-02-00054-s001.pdf]

**Supplementary Table 1: List of primers [18] used in qPCR for genome copy analysis.**

|                      | Gene Symbol | Forward Primer       | Reverse Primer       |
|----------------------|-------------|----------------------|----------------------|
| Nuclear genome       | Actin 1     | GGATATGCTCTCCCCCATGC | TCCCTCACAATTTCCCGCTC |
|                      | GAPDH       | GGATATGCTCTCCCCCATGC | TCCCTCACAATTTCCCGCTC |
| Plastid genome       | Atp I       | CCACAAACCATCCCAACCGA | AAAGAGCACCCGACCAGTTC |
|                      | psbA        | ACATCGGATGGTTCGGTGTT | GATCGCCGCAGAAGTAGGAA |
| Mitochondrial genome | cob         | TCCTAATGTTTTGGGGCATC | AGAATGGCATGGATCGGTAG |
|                      | cox II      | GCCAGAAACGGAGAGTTGAG | TCGTATATCGCTCCACCACA |

**Supplementary Table 2: Times required for CTAB-based, QIAGEN DNeasy Plant Mini Kit, nuclear pellet and optimized nuclear pellet methods of extracting genomic DNA. The time required was calculated with 4 samples for each extraction method.**

| Methods                      | Extraction |            | Purification |            | Total (min) |
|------------------------------|------------|------------|--------------|------------|-------------|
|                              | Incubation | Centrifuge | Incubation   | Centrifuge |             |
| CTAB-based                   | 80         | 35         | 65           | 10         | 190         |
| QIAGEN DNeasy Plant Mini Kit | 15         | 7          | 5            | 3          | 30          |
| Nuclear pellet               | 185        | 50         | -            | -          | 235         |
| Optimized nuclear pellet     | 185        | 50         | 70           | 55         | 360         |
